# Supplementary material
Source: MDPI journal article supplement (https://www.mdpi.com/2073-4395/13/7/1734)
Supplement: s1 [file s1]

**Supplementary Materials: Testing and validating the ECOSSE-model for estimating soil respiration from eight European permanent grassland sites**

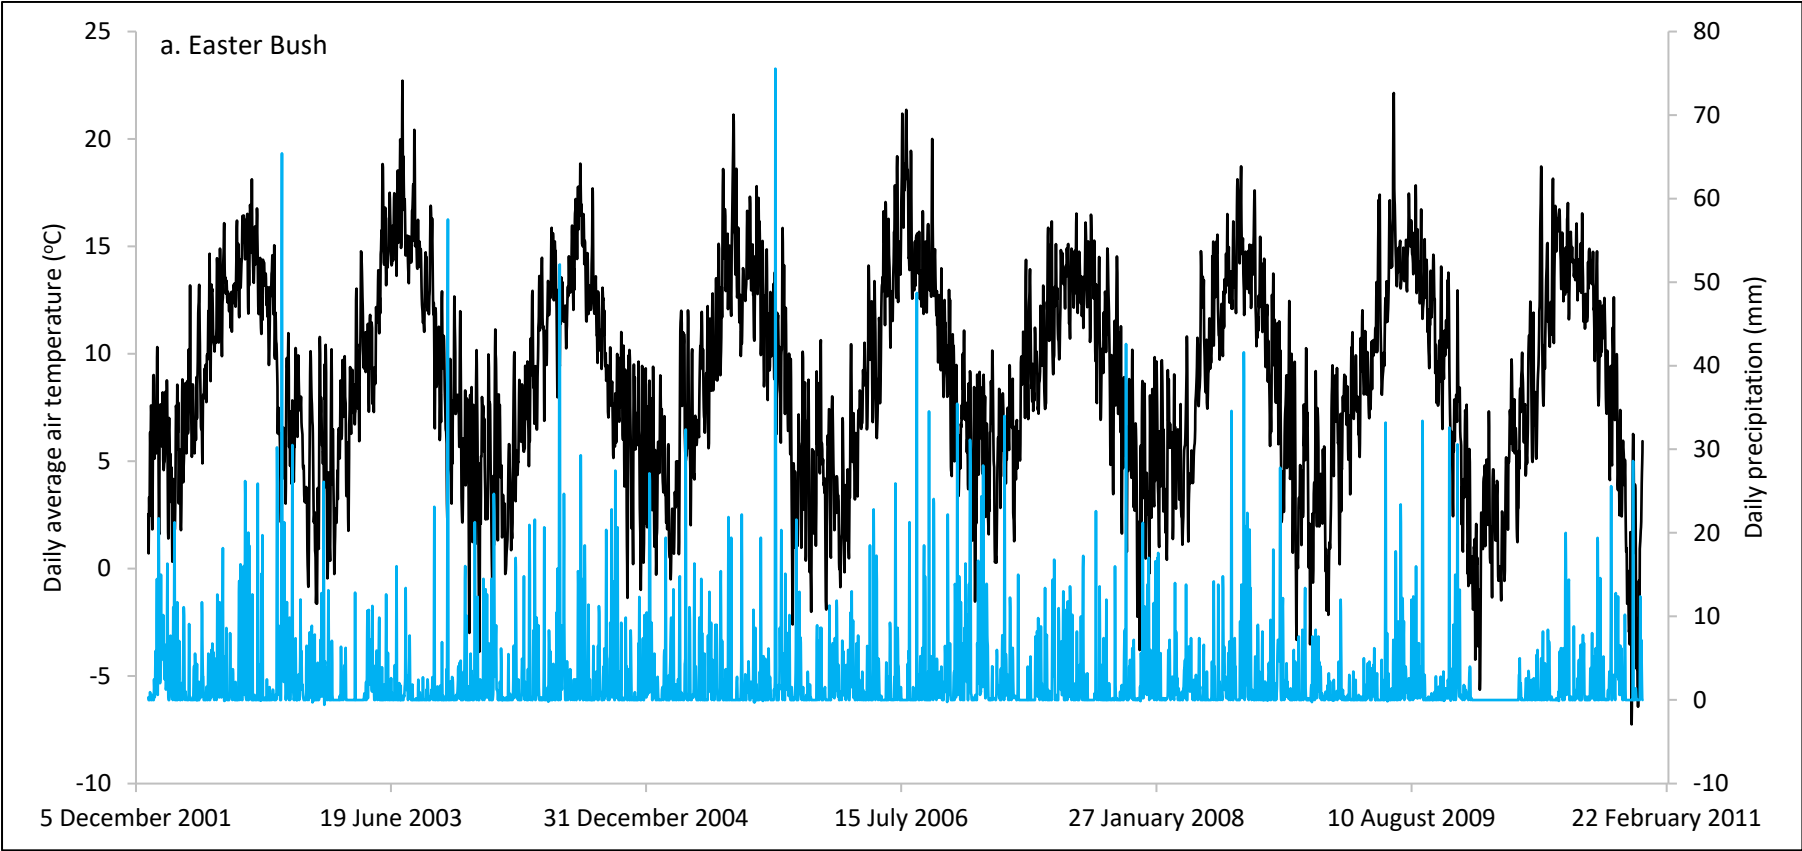

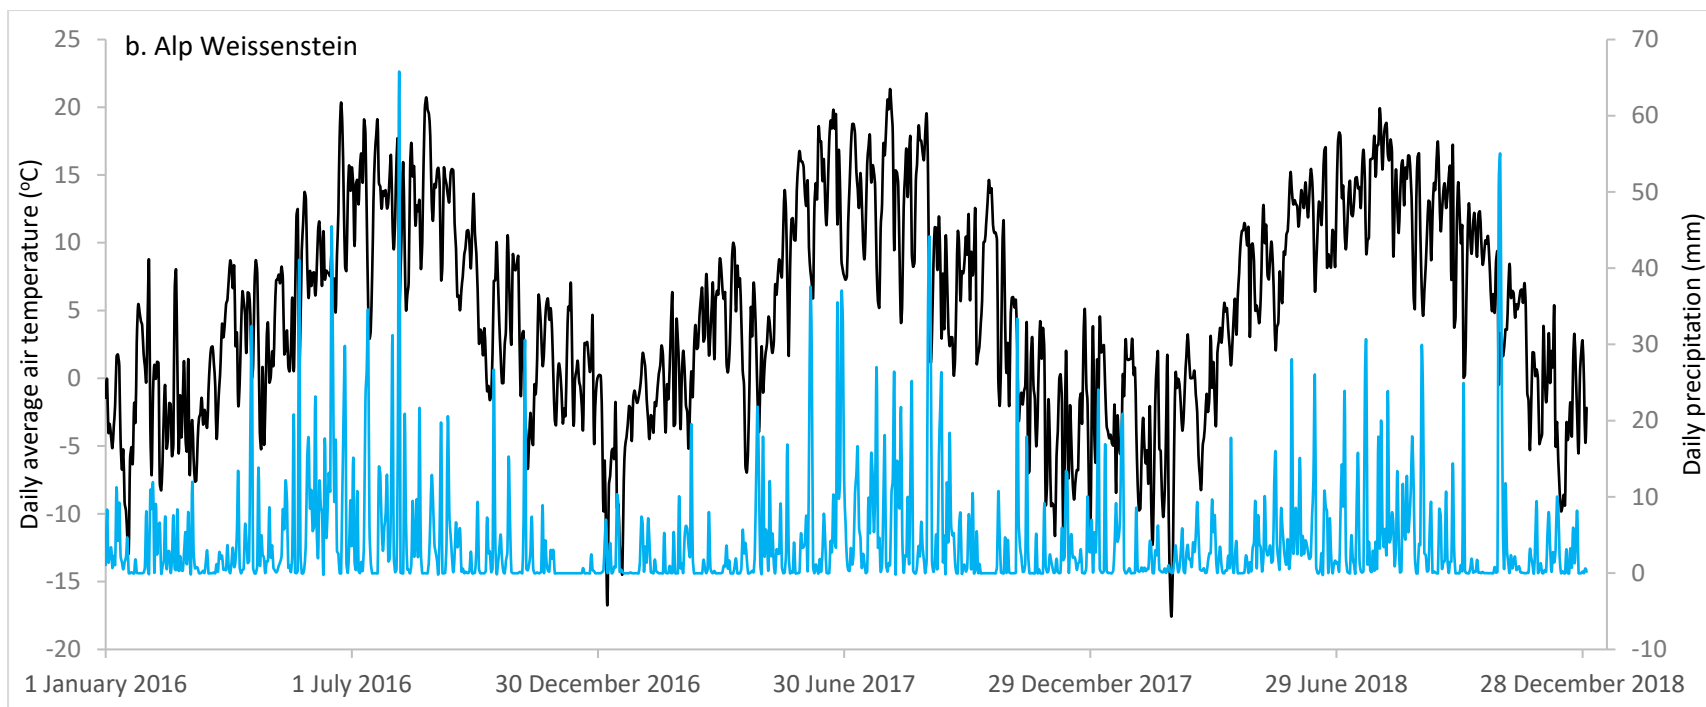

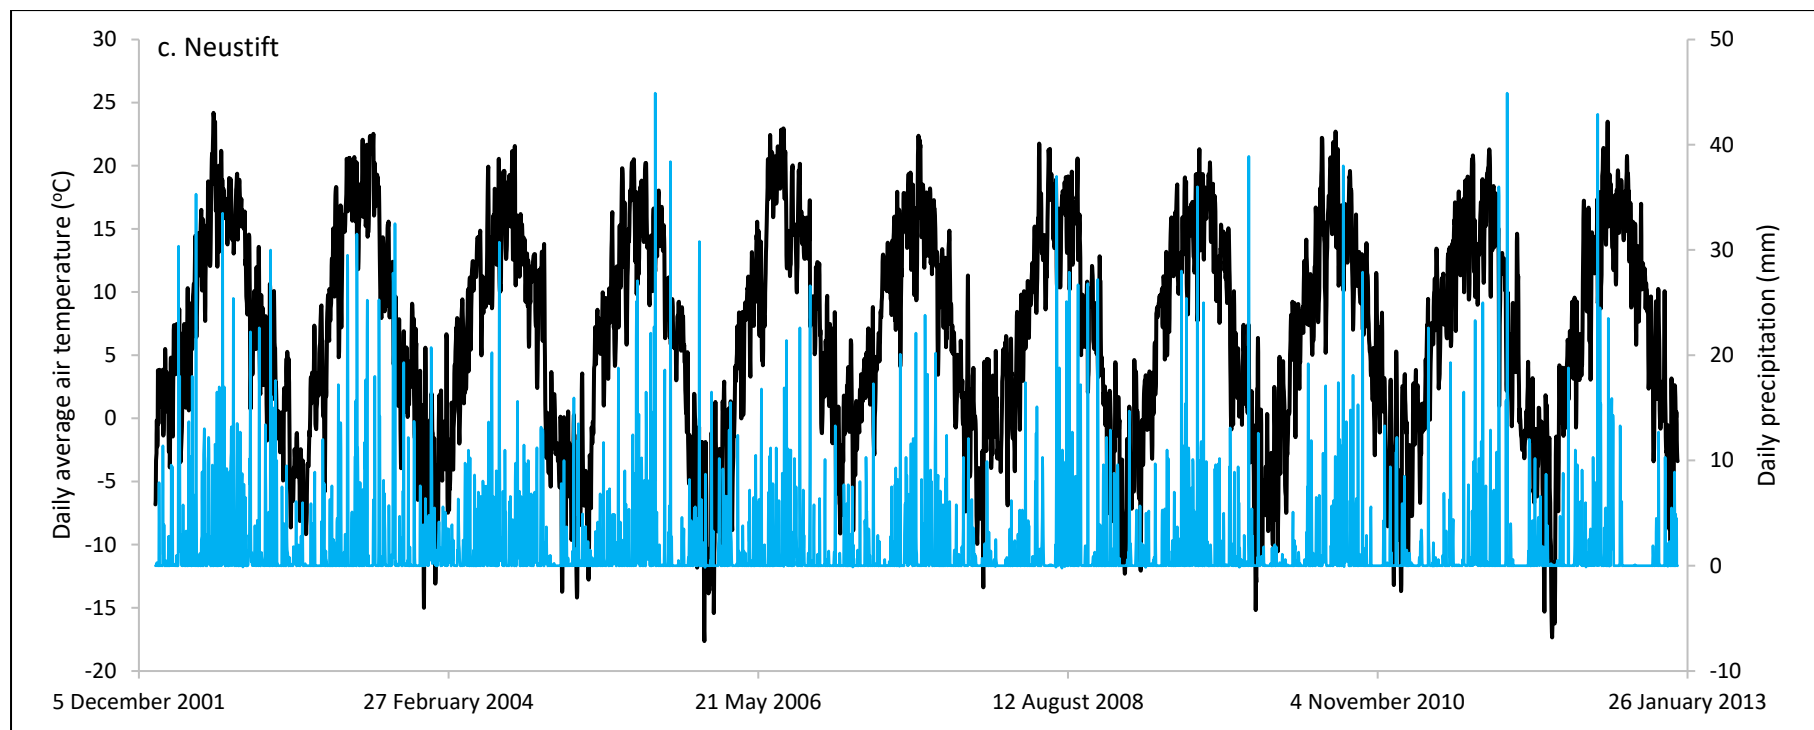

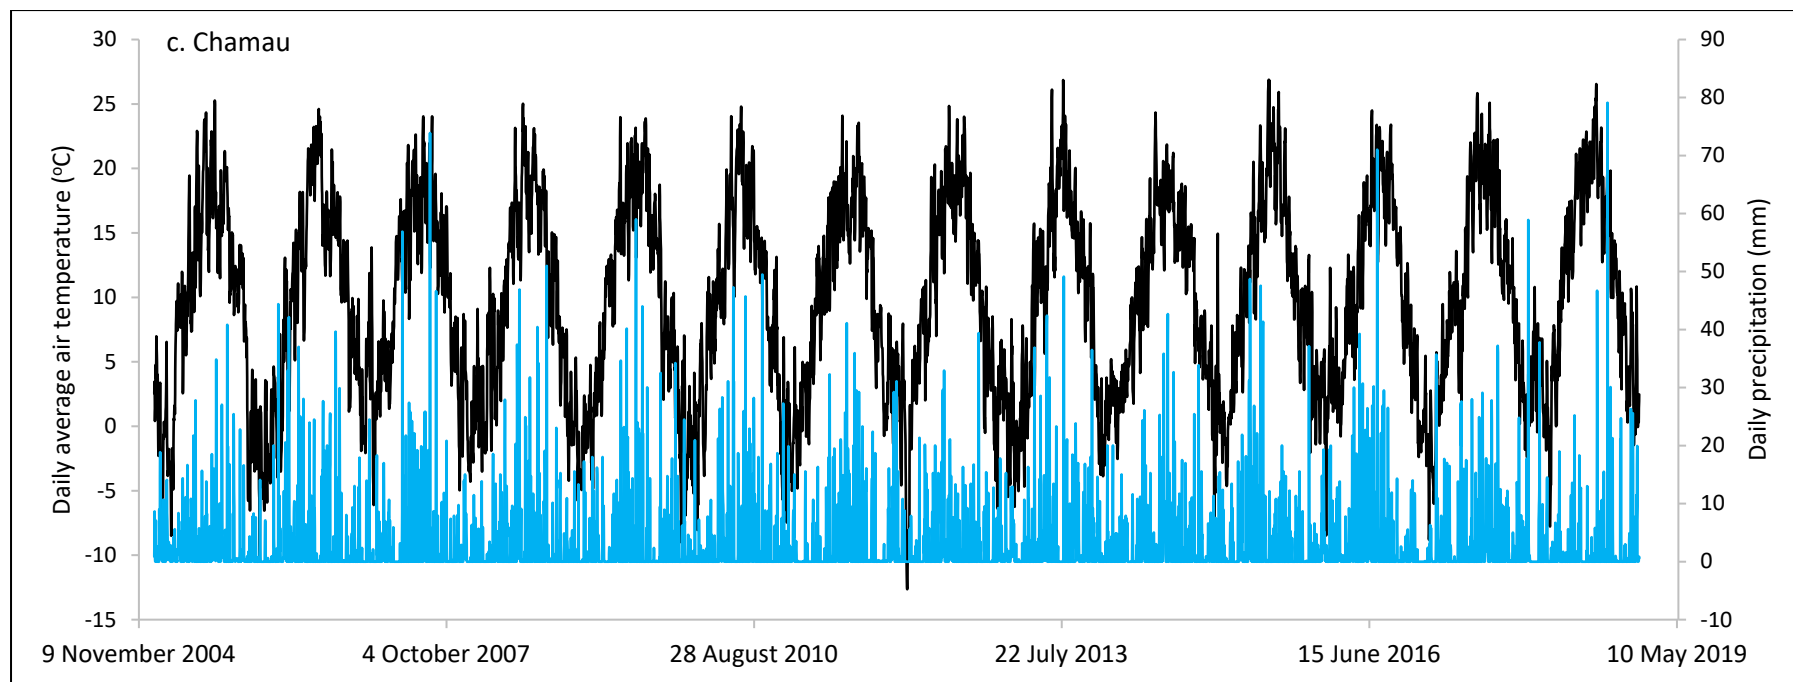

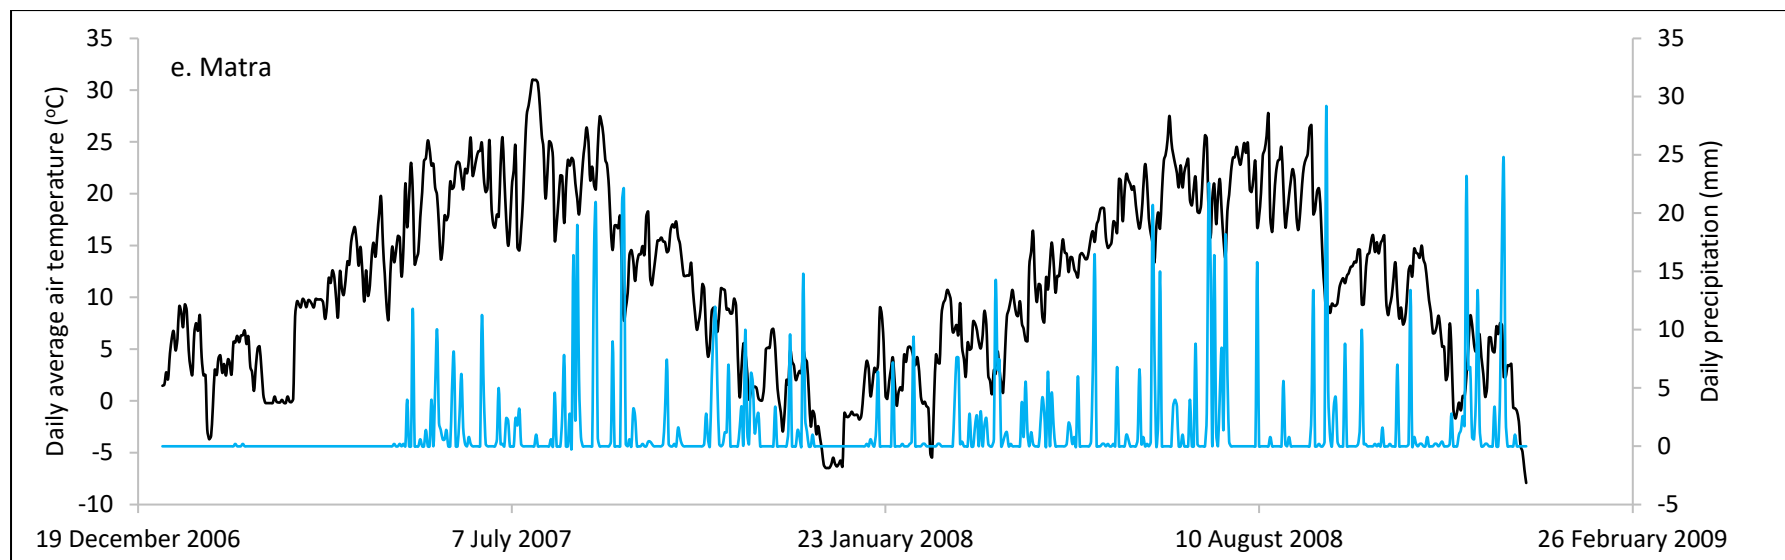

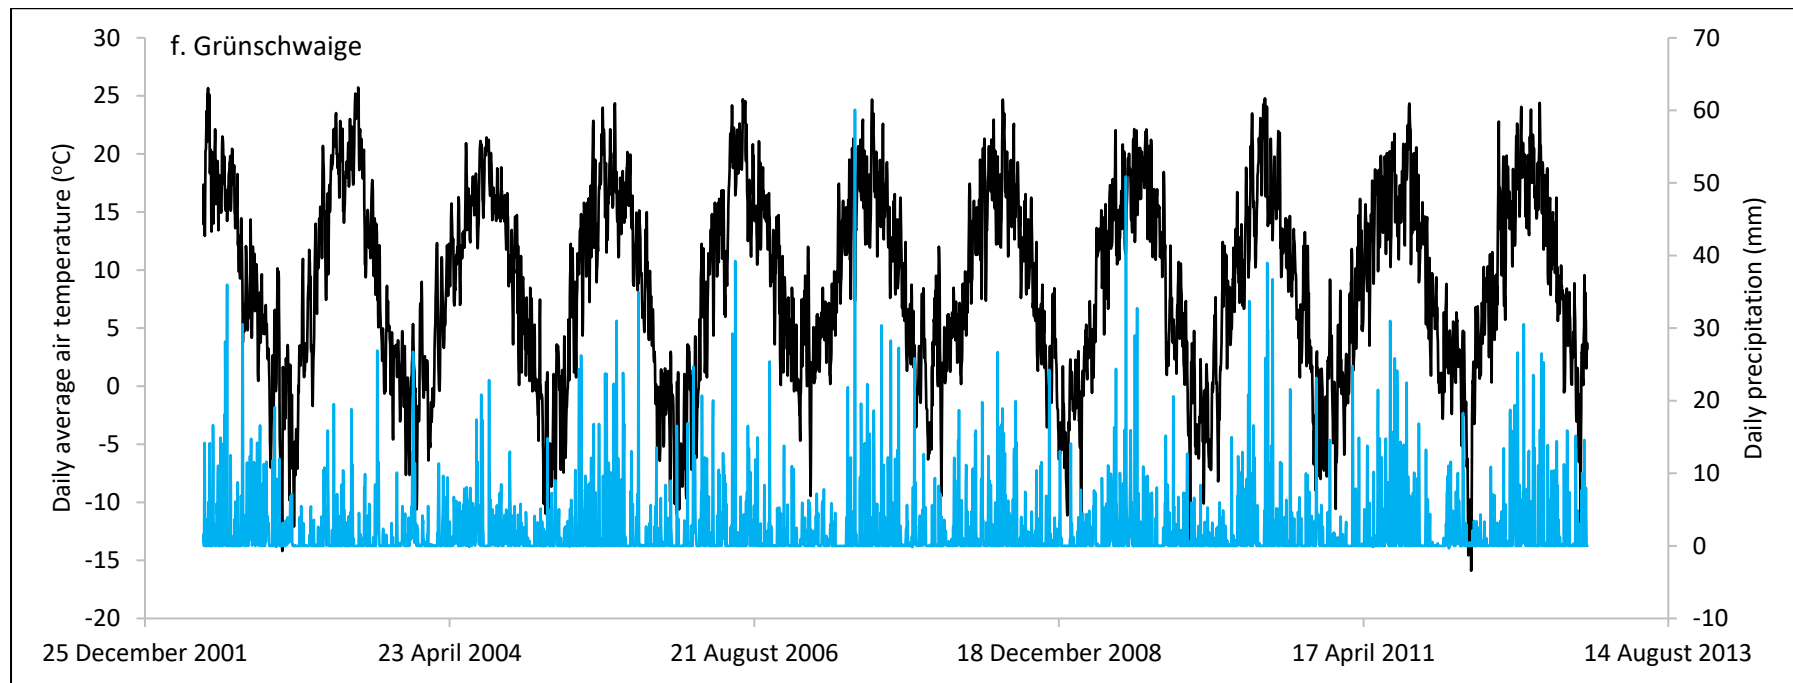

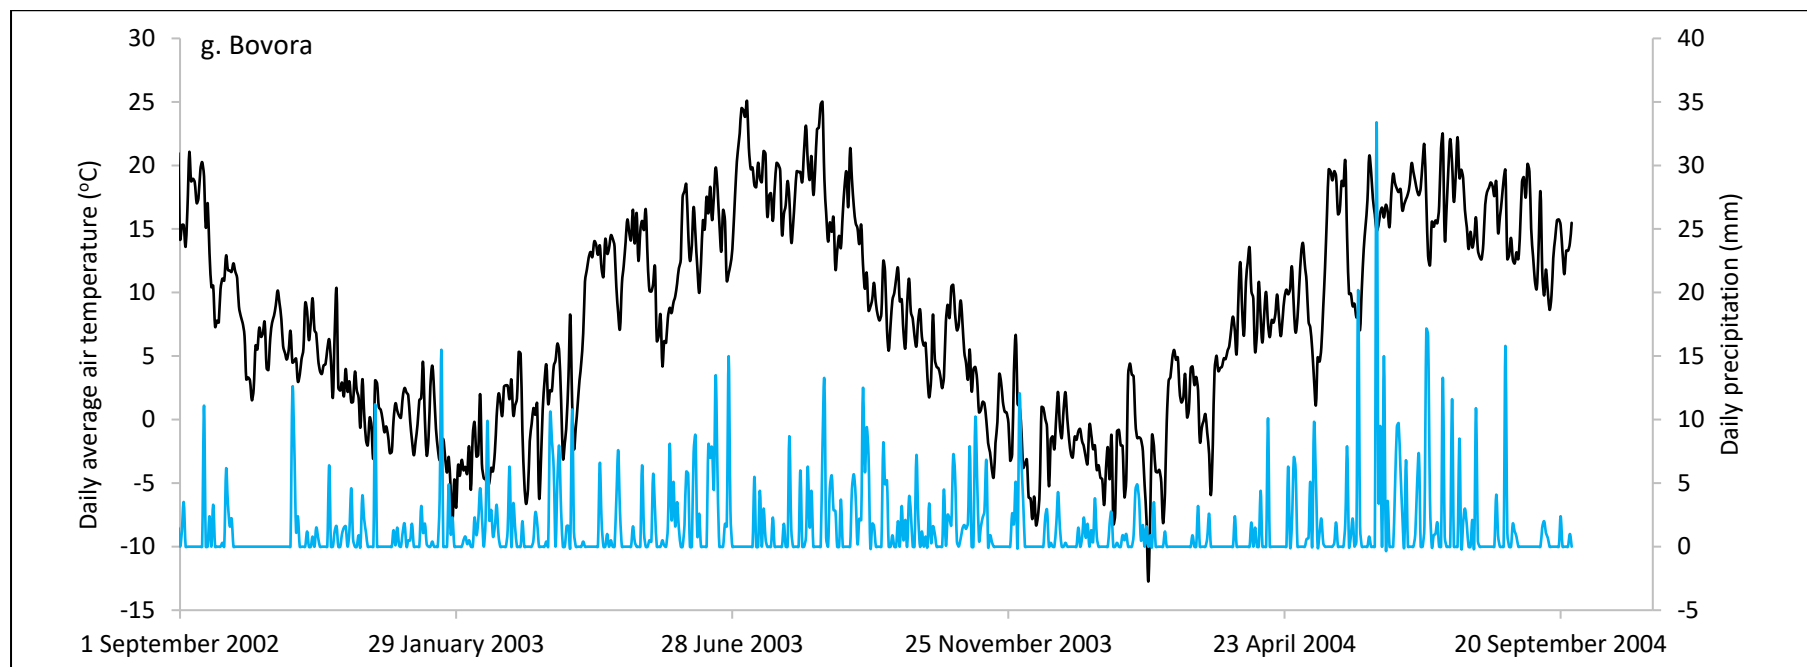

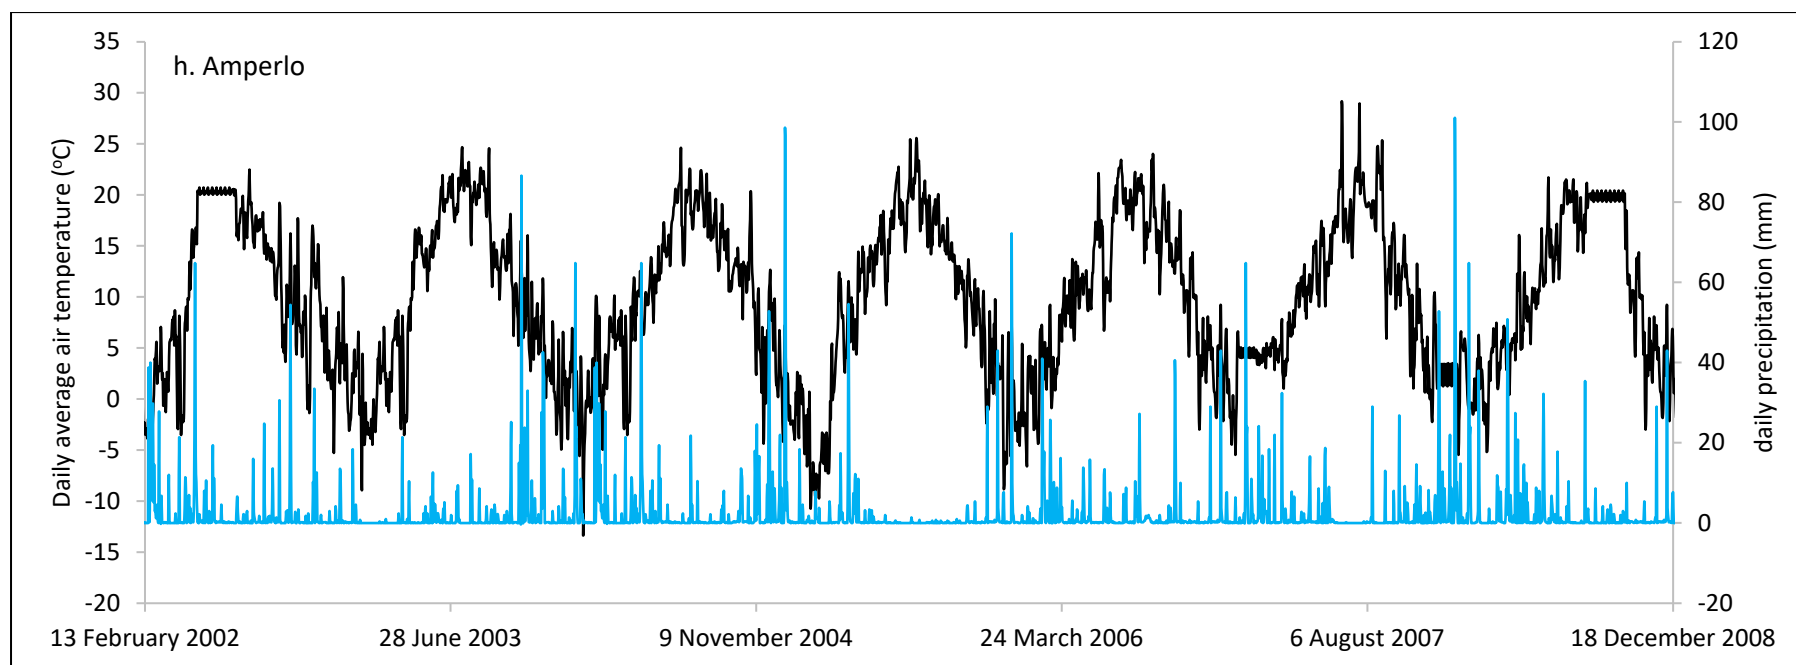

Figure S1: Average daily air temperature (°C; black line) and precipitation (mm; blue line) at the experimental sites during the measurements of net ecosystem respiration



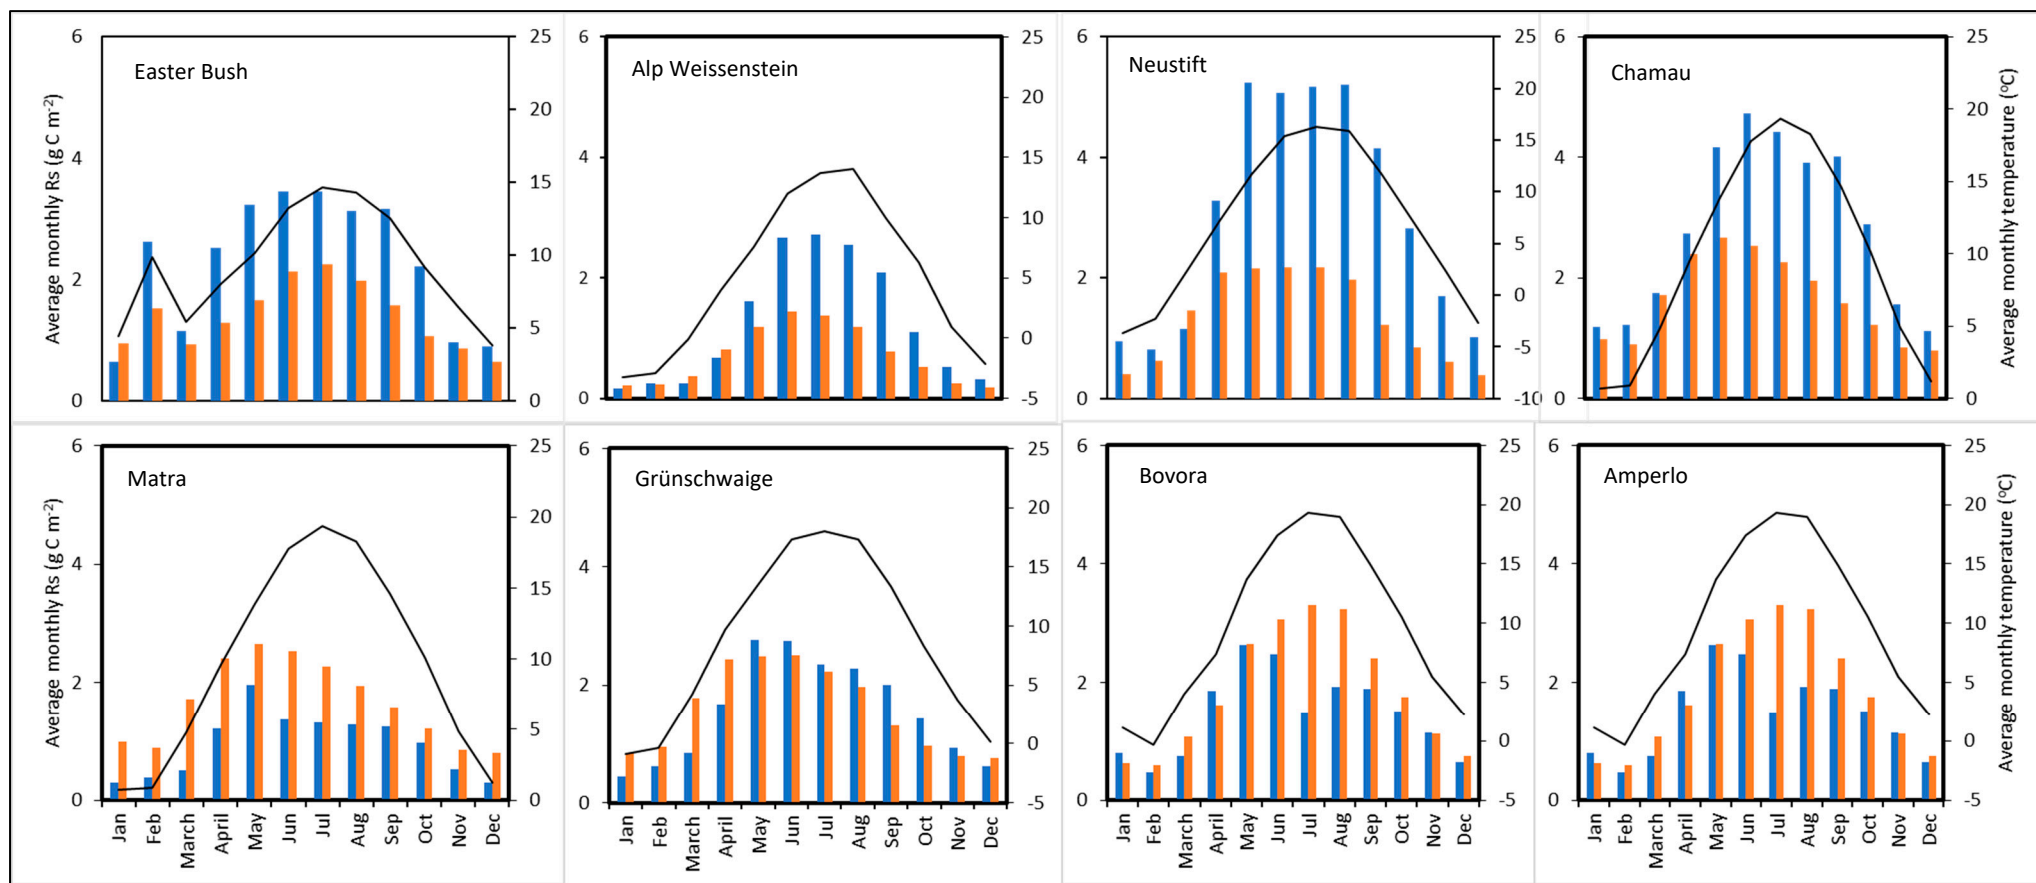

Figure S2: Relationships between estimated (blue bar) and simulated (orange bar) monthly cumulative soil respiration ( $R_s$ ) and average monthly air temperature (black line) at the investigated sites.
